# Supplementary material for: Chelator-Free Copper-64-Incorporated Iron Oxide Nanoparticles for PET/MR Imaging: Improved Radiocopper Stability and Cell Viability
Source: MDPI journal article supplement (doi:10.3390/nano12162791), 2022-08-14
Supplement: s1 [file s1]

Supplementary Materials

# **Chelator-Free Copper-64-Incorporated Iron Oxide Nanoparticles for PET/MR Imaging: Improved Radiocopper Stability and Cell Viability**

**Hye Min Jang <sup>1,2</sup>, Myung Hwan Jung <sup>1</sup>, Jae Sang Lee <sup>1</sup>, Jun Sig Lee <sup>3</sup>, In-Cheol Lim <sup>3</sup>, Hyunsik Im <sup>2</sup>, Sang Wook Kim <sup>4</sup>, Sung-A Kang <sup>5</sup>, Won-Je Cho <sup>1,\*</sup> and Jun Kue Park <sup>1,\*</sup>**

1 Korea Multi-Purpose Accelerator Complex, Korea Atomic Energy Research Institute, 181 Mirae-ro, Gyeongju 38180, Korea

2 Division of Physics and Semiconductor Science, Dongguk University, Seoul 04620, Korea

3 Korea Atomic Energy Research Institute, Daedeok-daero 989, Daejeon 34057, Korea

4 Department of Advanced Materials Chemistry, Dongguk University, Gyeongju 38066, Korea

5 Advanced Bio Convergence, Pohang Technopark, Pohang 37668, Korea

\* Correspondence: wonje59@kaeri.re.kr (W.-J.C.); jkuepark@kaeri.re.kr (J.K.P.)

X-ray photoelectron spectroscopy (XPS) results of IO@SiO<sub>2</sub> and Cu-IO@SiO<sub>2</sub> nanoparticles (NPs)

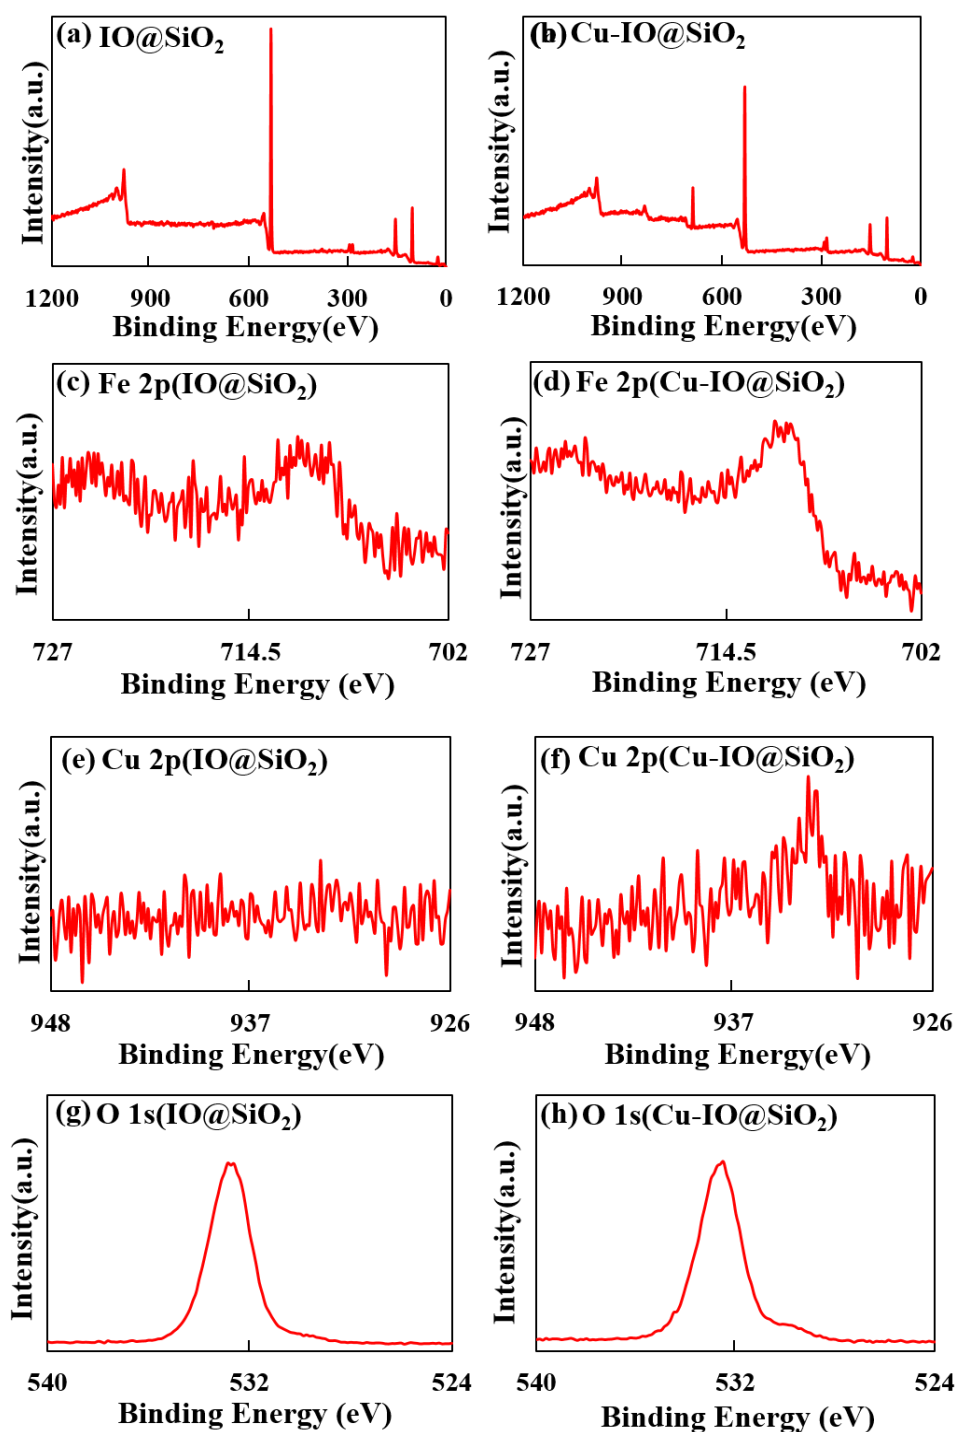

Figure S1. Survey data of (a) IO@SiO<sub>2</sub> and (b) Cu-IO@SiO<sub>2</sub>. Fe 2p spectra of (c) IO@SiO<sub>2</sub> and (d) Cu-IO@SiO<sub>2</sub>. Cu 2p spectra of (e) IO@SiO<sub>2</sub> and (f) Cu-IO@SiO<sub>2</sub>. O 1s spectra of (g) IO@SiO<sub>2</sub> and (h) Cu-IO@SiO<sub>2</sub>.

Positron Emission Tomography (PET) images of direct injection into cancer of *BALB/c* mice

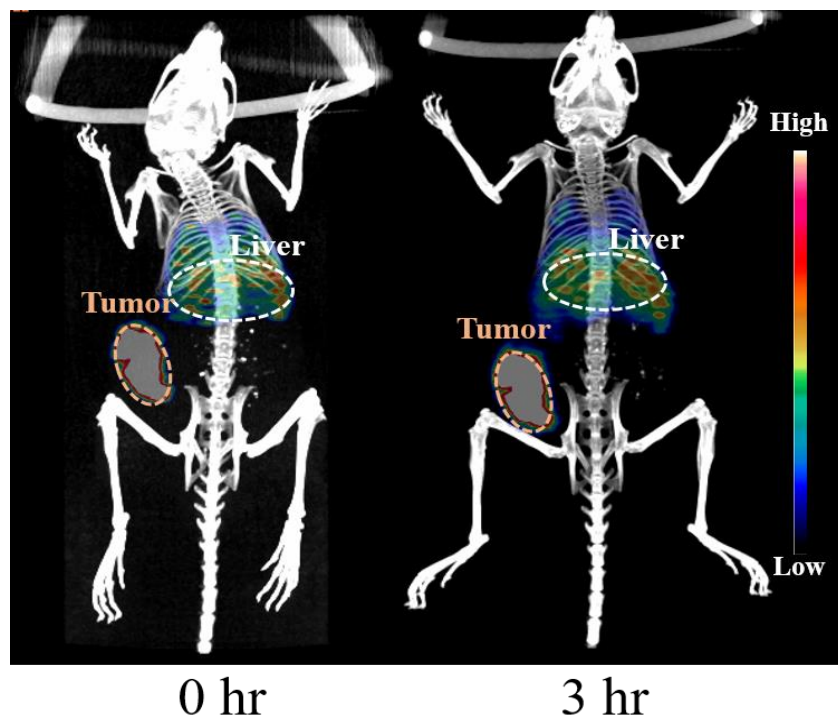

Figure S2. PET images measured immediately and in 3 h after intratumoral injection (direct injection into cancer) of the NPs for the *BALB/c* mice.
